# Supplementary material for: Difficult-to-neutralize global HIV-1 isolates are neutralized by antibodies targeting open envelope conformations
Source: PubMed Central journal article supplement (PMC6602974; doi:10.1038/s41467-019-10899-2), 2019-07-01
Supplement: 41467_2019_10899_MOESM1_ESM.pdf [file 41467_2019_10899_MOESM1_ESM.pdf]

**Supplementary Information for  
Difficult-to-neutralize global HIV-1 isolates are  
neutralized by antibodies targeting open  
envelope conformations**

Han et al.

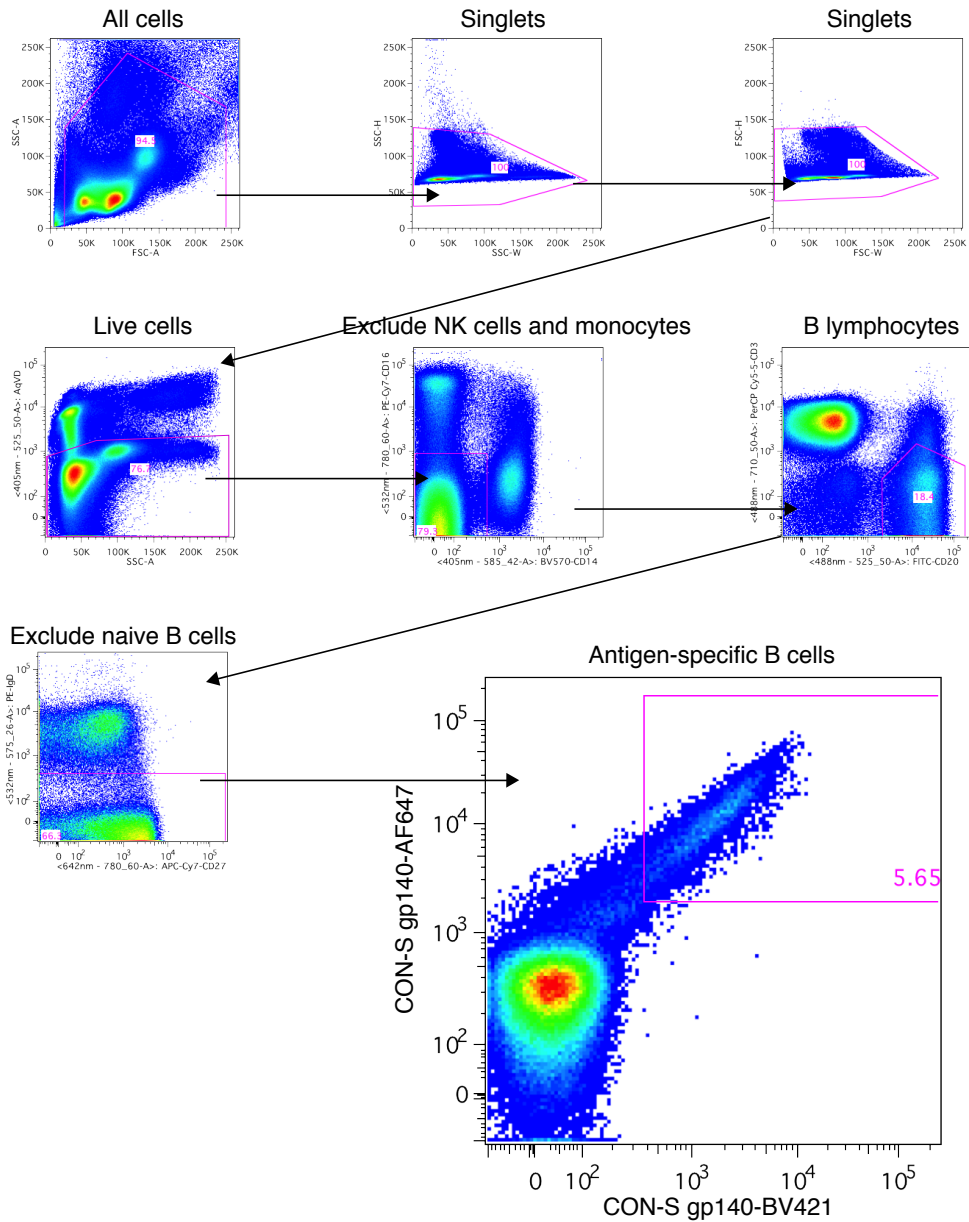

**Supplementary Figure 1. Fluorescence-activated cell sorting of envelope-specific B cells.** The gating strategy to identify single B cells specific for HIV-1 envelope is shown for L983 as representative for all three B cell sorts performed. The antigen-specific FACS plot for each macaque is shown in Figure 1.

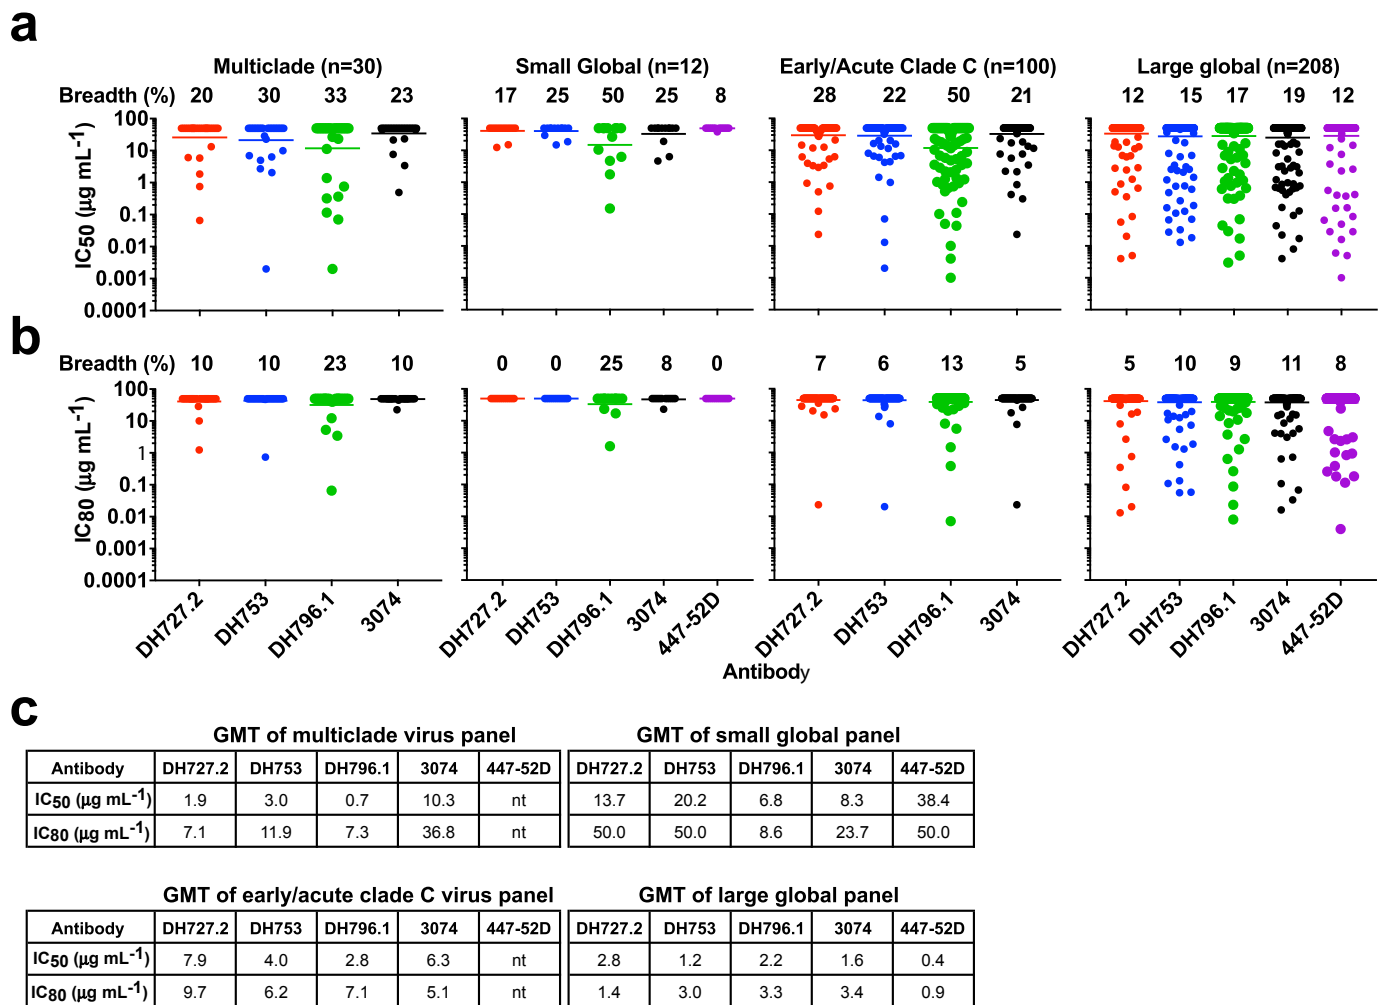

**Supplementary Figure 2. Vaccine-induced antibody neutralization of HIV-1 tier 2 viruses categorized into their standard virus panels.**

(a,b) Macaque vaccine-induced antibodies DH727.2, DH753, and DH796.1 *in vitro* neutralization of HIV-1 infection of TZM-bl cells. 3074 and 447-52D are human HIV-1 antibodies from infection that were included for comparison. Neutralization was assessed against four standard panels of viruses. Neutralization titers in µg mL<sup>-1</sup> are shown as the concentration of antibody that inhibits (a) 50% (IC<sub>50</sub>) or (b) 80% (IC<sub>80</sub>) of virus replication. The neutralization breadth is shown above each column as the percentage of viruses neutralized by 50% or 80%. Each symbol represents an individual virus. The horizontal bar represents the geometric mean of the IC<sub>50</sub> or IC<sub>80</sub> for all viruses.

(c) The geometric mean titer (GMT) of only the neutralized viruses in each panel. Source data are provided as a Source Data file.

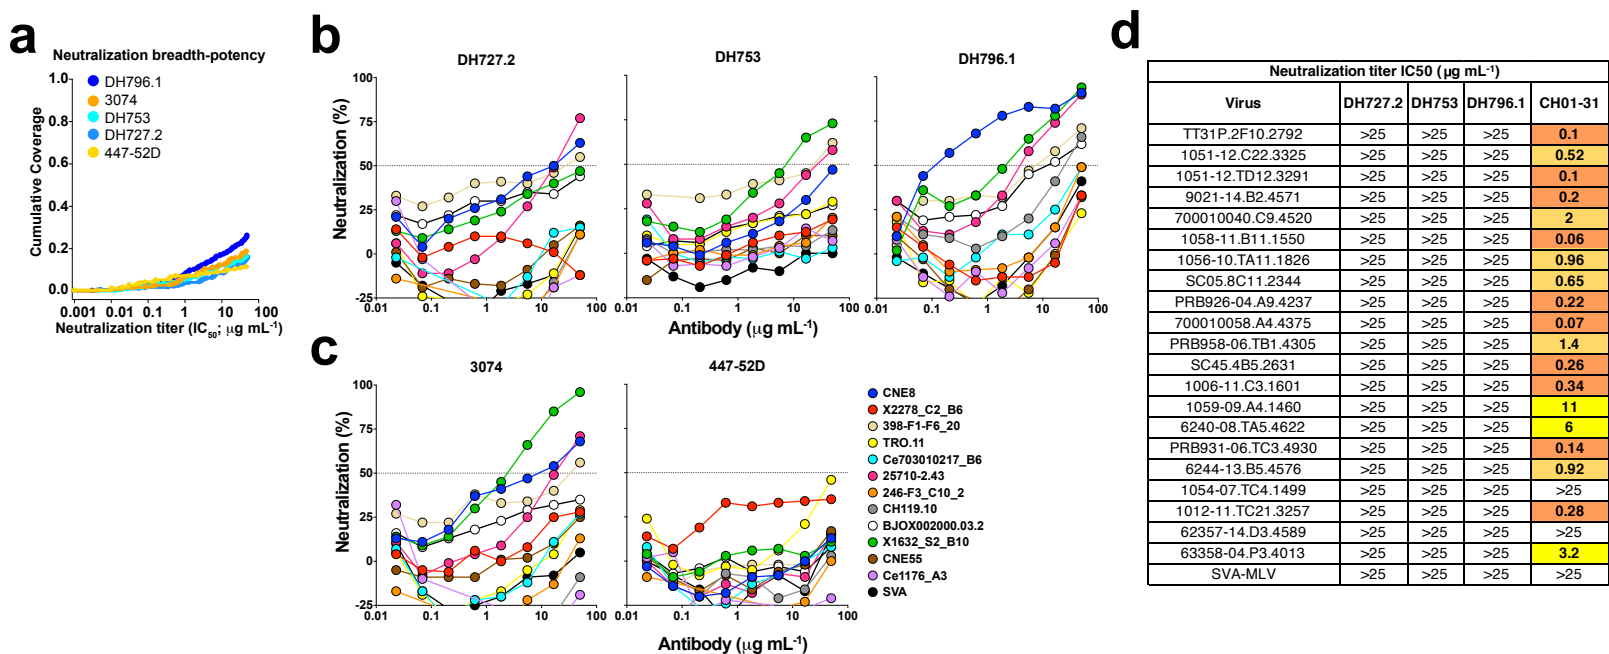

### Supplementary Figure 3. Neutralization breadth and potency against diverse global HIV-1 isolates and transmitted/founder viruses.

**(a)** The breadth-potency is shown as cumulative distributions of the IC<sub>50</sub> results for the V3 antibodies based on the 292 viruses in the combined panels (except for 447-52D, which was based on the 208 virus global panel). DH796.1 ranked highest, although the cumulative distribution was not significantly different than 3074 (Kolmogorov-Smirnov  $p = 0.38$ ,  $n = 208$  or 292 viruses), and 3074 ranks higher outside of clade C. See the trees in Fig. 2 and the complete dataset in Supplementary Data File 1.

**(b,c)** Neutralization of 12 global HIV-1 isolates<sup>1</sup> infection of TZM-bl cells by **(b)** macaque vaccine-induced antibodies and **(c)** human antibodies from natural infection. Viruses in this panel with sensitivity to DH727.2, DH753, DH796.1, and macaque BG505 immune sera are shown in Fig. 1h.

**(d)** DH727.2, DH753, and DH796.1 lack neutralization of selected clade B transmitted/founder HIV-1 isolates. Values are the concentration of antibody in  $\mu\text{g mL}^{-1}$  that inhibits 50% of virus replication in TZM-bl cells (IC<sub>50</sub>). As a positive control for HIV-1 neutralization a mixture of bnAbs CH01 and CH31 was used starting at 25  $\mu\text{g mL}^{-1}$ . Values above 25  $\mu\text{g mL}^{-1}$  are considered negative for neutralization. Neutralization titers are color-coded as follows: white >25; yellow 24.9-5, light orange 4.9-0.5, orange 0.49-0.05, red <0.05. Murine leukemia virus (SVA-MLV) was used as a negative control virus. Source data are provided as a Source Data file.



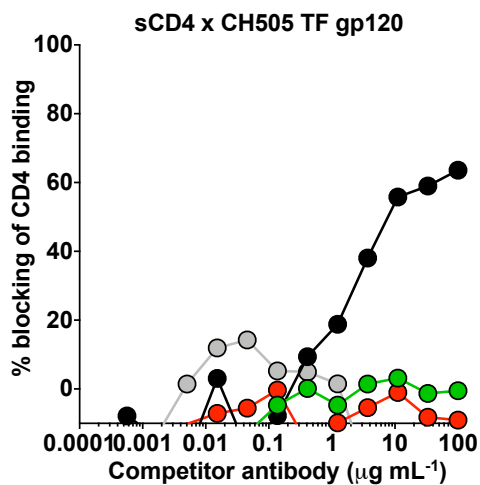

**Supplementary Figure 4. Rhesus antibodies do not block CD4 engagement of Env gp120.** Soluble CD4 binding to CH505 TF gp120 in the presence of increasing concentrations of rhesus monoclonal V3 antibodies DH727.2 (red), DH753 (blue), DH796.1 (green). Blocking greater than 20% is considered positive. CH106 was used as a positive control (black) and anti-influenza antibody CH65 (gray) was used as a negative control. Source data are provided as a Source Data file.

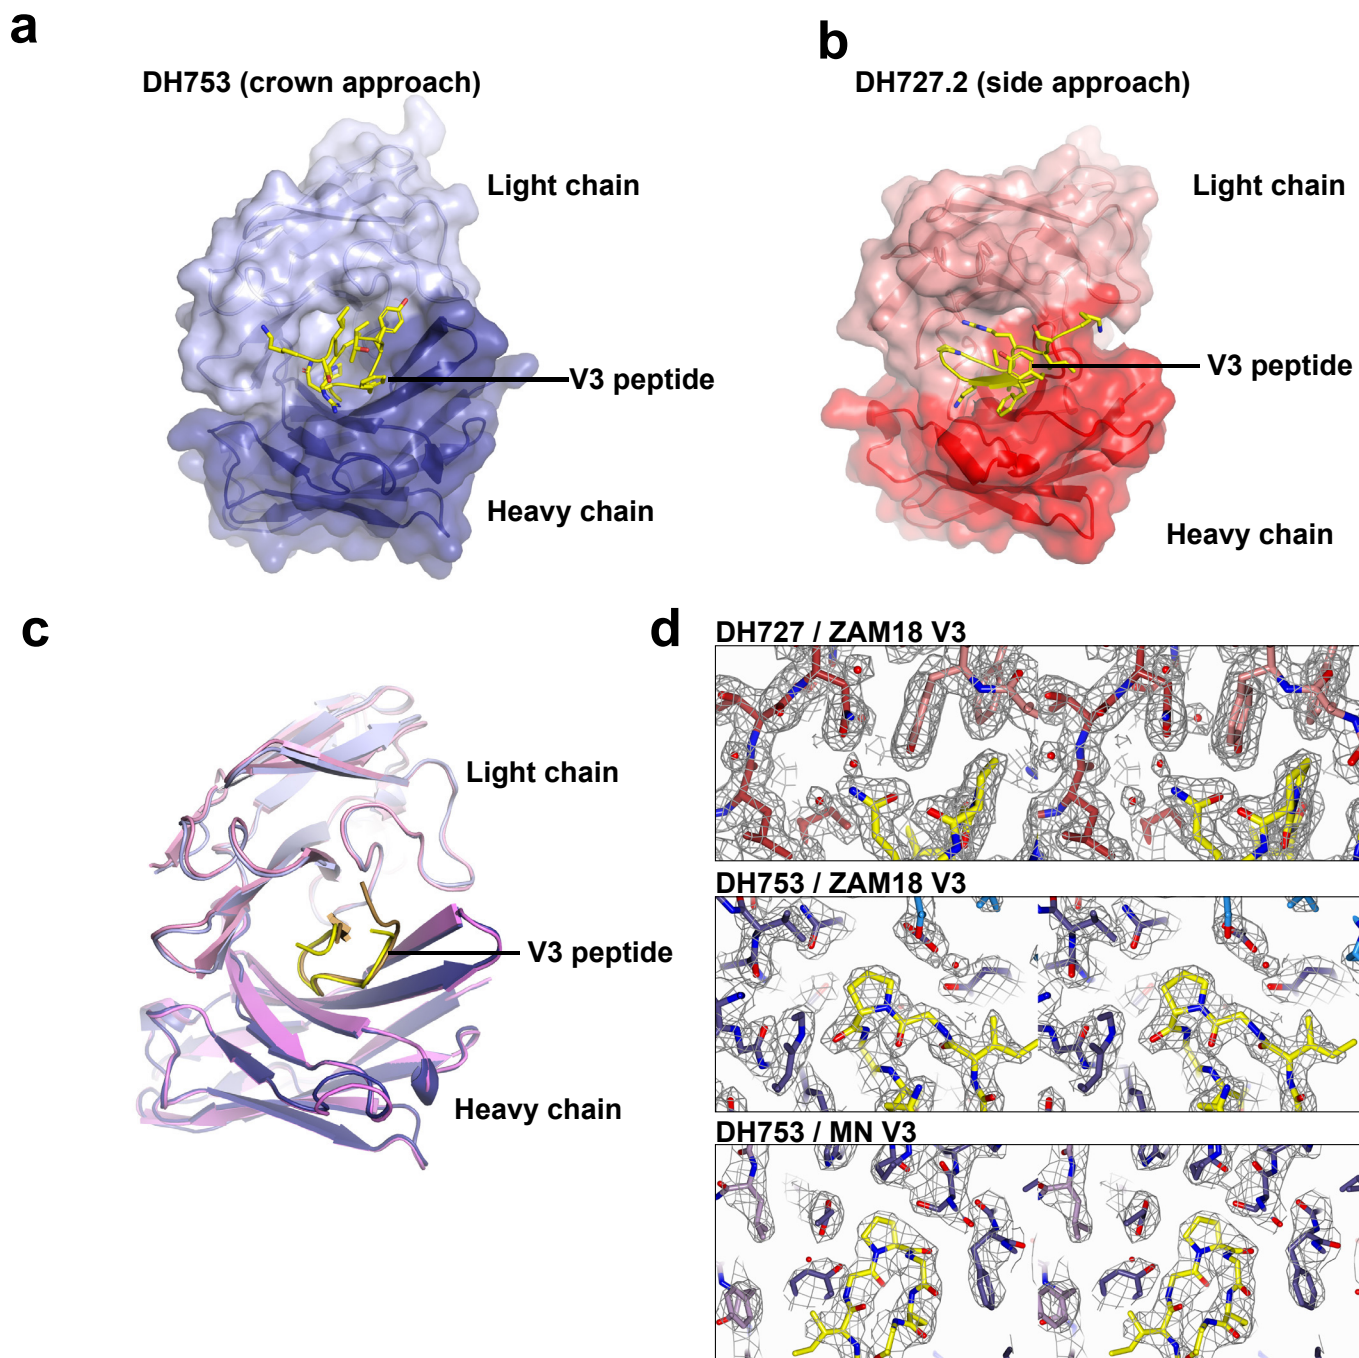

**Supplementary Figure 5. V3 peptide side chain interactions with DH753 and DH727.2 Fabs.**

**(a)** The crystal structure of DH753 is shown with the L chain rendered in lilac, the FabH chain in dark purple bound to ZAM18 V3 hairpin peptide in yellow.

**(b)** The crystal structure of DH727.2 bound to ZAM18 V3 peptide. The Fab is shown in a similar orientation as in **a** with the L chain in salmon, the FabH chain in red.

**(c)** Superposition of DH753 Fab bound to ZAM18 (yellow) and MN (orange) V3 peptides.

**(d)** Depicted are stereo images of the 2Fo-Fc representative electron density maps at 1.0 sigma contour levels. The figures are centered on the DH727 interface with ZAM18 V3 peptide (specifically at Gln315) and the DH753 interface with ZAM18 and MN peptides (at Pro313), respectively at a 1.0 sigma contour level.

**a**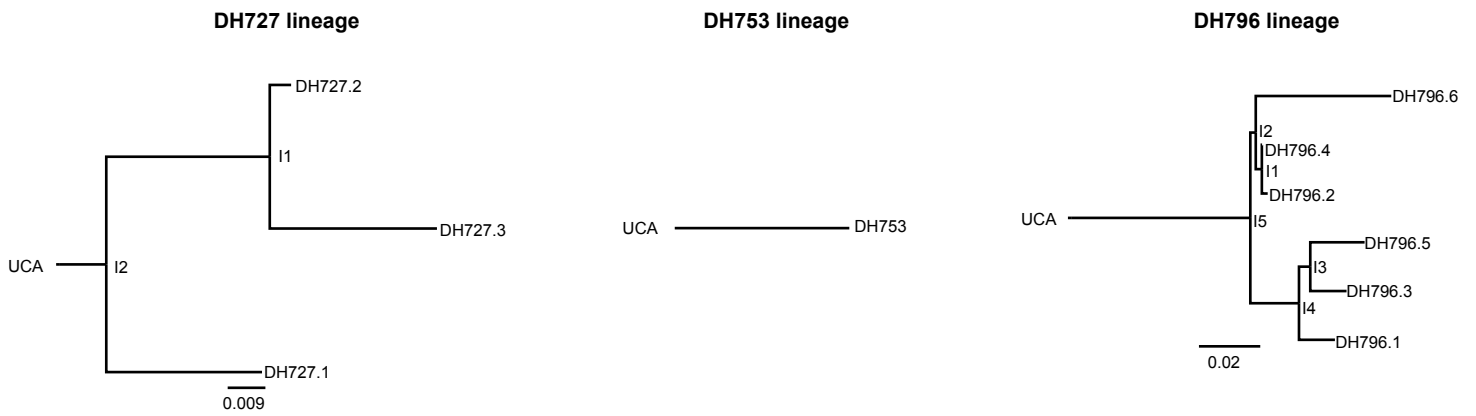**b**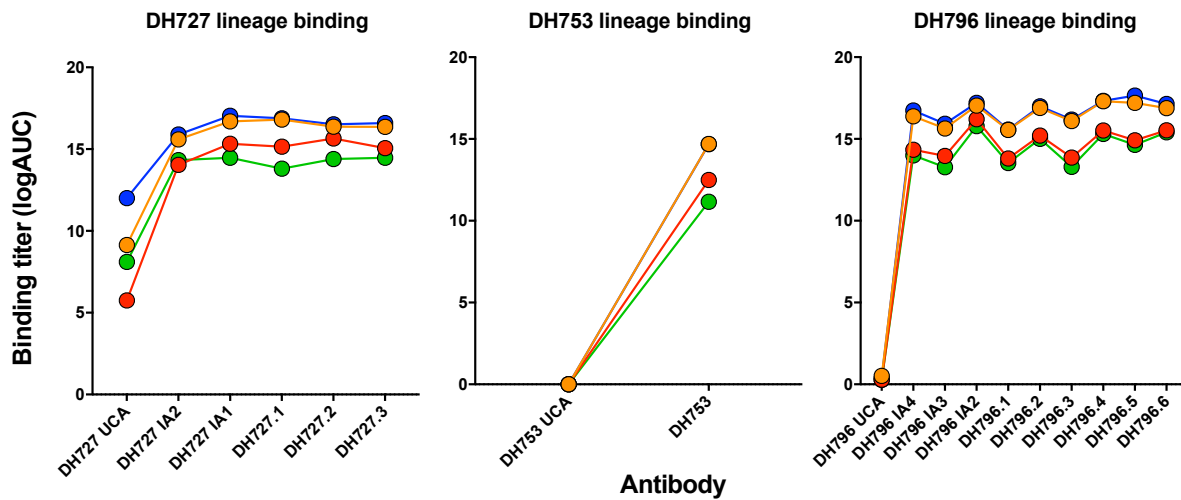**c**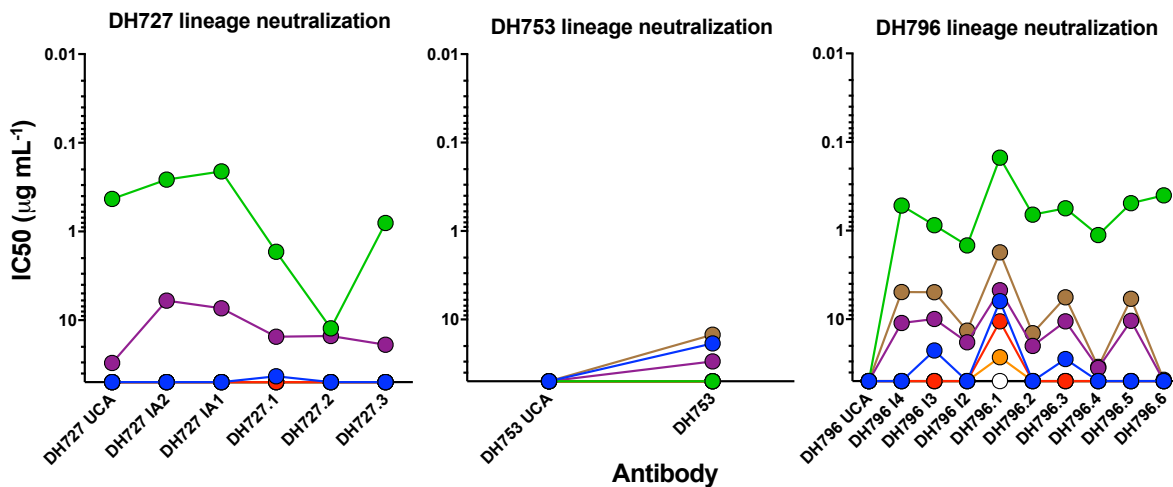

### Supplementary Figure 6. Somatic mutation of vaccine-induced antibodies augments Env binding and neutralization.

(a) Maximum-likelihood phylogenetic tree of each antibody lineage was inferred with Cloanlyst. Each tree is rooted with an unmutated common ancestor (UCA).

(b) Env binding titers as log area-under-the-curve (AUC) for each member of the DH727, 753, and 796 antibody lineages. Different color curves show binding titers for different gp120 proteins or V3 region peptides (CH505 TF gp120, blue; CON-S V3, red; ConC V3, green; and A.92RW020 gp120, orange).

(c) Neutralization of HIV-1 infection of TZM-bl cells by the antibodies comprising the three lineages. Neutralization is represented as IC<sub>50</sub> for 6 HIV-1 isolates (398-F1\_F6\_20, blue; CNE8, green; BJ0X002000.03.2, red; CH119.10, orange; 25710-2.43, purple; X1632-S2-B10, brown and the negative control murine leukemia virus SVA (white). Source data are provided as a Source Data file.

**Supplementary Table 1. Immunogenetics of clonally related antibodies in the DH727, 753, and 796 antibody lineages.**

| Antibody <sup>b</sup> | Immunogen   | Immunizations <sup>c</sup> | Ig Heavy Chain <sup>a</sup> |        |                    |                   | Ig Light Chain <sup>a</sup> |       |                    |                   |
|-----------------------|-------------|----------------------------|-----------------------------|--------|--------------------|-------------------|-----------------------------|-------|--------------------|-------------------|
|                       |             |                            | VH                          | JH     | VH mutation (% nt) | HCDR3 Length (aa) | VK                          | JK    | VK mutation (% nt) | LCDR3 Length (aa) |
| DH727.1               | CH505 TF    | 4X gp120                   | 1-E*01                      | 4-1*01 | 3.8                | 10                | 2-S20*01                    | 3-2*1 | 2.1                | 9                 |
| DH727.2               | CH505 TF    | 4X gp120                   | 1-E*01                      | 4-1*01 | 5.2                | 10                | 2-S20*01                    | 3-2*1 | 2.4                | 9                 |
| DH727.3               | CH505 TF    | 6X gp120                   | 1-E*01                      | 4-1*01 | 8.3                | 10                | 2-S20*01                    | 3-2*1 | 4.3                | 9                 |
| DH753                 | CON-S       | 2XDNA/1XrAd5/<br>15Xgp140  | 3-W*02                      | 1-1*01 | 7.5                | 13                | 1-F                         | 1-LC1 | 4.7                | 11                |
| DH796.1               | VRC-A, B, C | 2XDNA/1XrAd5               | 4-I*01                      | 5-1*01 | 10                 | 12                | 2-S20*01                    | 3-2*1 | 2.1                | 9                 |
| DH796.2               | VRC-A, B, C | 2XDNA/1XrAd5               | 4-I*01                      | 5-1*01 | 8.2                | 12                | 2-S20*01                    | 3-2*1 | 0.4                | 9                 |
| DH796.3               | VRC-A, B, C | 2XDNA/1XrAd5               | 4-I*01                      | 5-1*01 | 10                 | 12                | 2-S20*01                    | 3-2*1 | 2.8                | 9                 |
| DH796.4               | VRC-A, B, C | 2XDNA/1XrAd5               | 4-I*01                      | 5-1*01 | 7.9                | 12                | 2-S20*01                    | 3-2*1 | 0.4                | 9                 |
| DH796.5               | VRC-A, B, C | 2XDNA/1XrAd5               | 4-I*01                      | 5-1*01 | 12                 | 12                | 2-S20*01                    | 3-2*1 | 2.1                | 9                 |
| DH796.6               | VRC-A, B, C | 2XDNA/1XrAd5               | 4-F*01                      | 5-1*01 | 7.7                | 12                | 2-S20*01                    | 3-2*1 | 2.5                | 9                 |

**a** Immunogenetics were inferred with the macaque library in Cloanlyst

**b** Antibodies were isolated as natural antibody pairs by single B cell PCR.

**c** DH753 was isolated from a macaque immunized with recombinant adenovirus serotype 5 (rAd5) expressing uncleaved gp140 oligomers and uncleaved gp140 oligomers as recombinant protein. DH796.1 was elicited with DNA immunization encoding gp145 and rAd5 encoding uncleaved gp140.

**Supplementary Table 2. Data collection and refinement statistics (molecular replacement)**

|                                                      | DH727.2 + ZAM18 V3<br>peptide | DH753 + ZAM18 V3<br>peptide                   | DH753 + MN V3<br>peptide     |
|------------------------------------------------------|-------------------------------|-----------------------------------------------|------------------------------|
| <b>Data collection</b>                               |                               |                                               |                              |
| Space group                                          | P12 <sub>1</sub> 1            | P2 <sub>1</sub> 2 <sub>1</sub> 2 <sub>1</sub> | P12 <sub>1</sub> 1           |
| Cell dimensions                                      |                               |                                               |                              |
| <i>a</i> , <i>b</i> , <i>c</i> (Å)                   | 41.51, 95.78, 58.05           | 45.86, 71.82, 134.75                          | 46.92, 138.32, 71.68         |
| $\alpha$ , $\beta$ , $\gamma$ (°)                    | 90, 92.67, 90                 | 90, 90, 90                                    | 90, 91.55, 90                |
| Resolution (Å)                                       | 50-1.8 (1.83-1.80)            | 50-2.20 (2.24-2.20)                           | 50-2.70 (2.75-2.70)          |
| <i>R</i> <sub>sym</sub> or <i>R</i> <sub>merge</sub> |                               |                                               |                              |
| <i>I</i> / $\sigma$ <i>I</i>                         | 16.7 (3.2)                    | 27.4 (3.1)                                    | 17.6 (3.0)                   |
| Completeness (%)                                     | 99.4 (99.4)                   | 100 (99.9)                                    | 99.5 (100)                   |
| Redundancy                                           | 3.9 (3.6)                     | 7.9 (7.2)                                     | 4.0 (4.2)                    |
| <b>Refinement</b>                                    |                               |                                               |                              |
| Resolution (Å)                                       | 29.0-1.80 (1.85-1.80)         | 43.4-2.2 (2.26-2.20)                          | 38.77-2.70 (2.77-2.70)       |
| No. reflections                                      | 41254 (2726)                  | 23313 (1624)                                  | 24977 (1816)                 |
| <i>R</i> <sub>work</sub> / <i>R</i> <sub>free</sub>  | 18.46/22.51<br>(20.74/24.88)  | 19.19/25.45<br>(25.19/31.76)                  | 16.99/25.63<br>(23.65/34.44) |
| No. atoms                                            |                               |                                               |                              |
| Protein                                              | 3260                          | 3217                                          | 6461                         |
| Ligand/ion                                           | 94                            | 121                                           | 231                          |
| Water/solvent                                        | 269                           | 88                                            | 15                           |
| <i>B</i> -factors                                    |                               |                                               |                              |
| Protein                                              | 26.15                         | 45.59                                         | 70.09                        |
| Ligand/ion                                           | 38.88                         | 54.05                                         | 85.31                        |
| Water/solvent                                        | 32.20                         | 42.54                                         | 83.36                        |
| R.m.s. deviations                                    |                               |                                               |                              |
| Bond lengths (Å)                                     | 0.008                         | 0.009                                         | 0.009                        |
| Bond angles (°)                                      | 1.204                         | 1.129                                         | 1.245                        |

Each dataset was integrated and scaled from diffraction images collected on one isomorphous crystal.

\*Values in parentheses are for highest-resolution shell.

**Supplementary Table 3. Rhesus macaque antibody PCR primers.**

| PCR round | Ig chain | Primer name    | Primer sequence                  |
|-----------|----------|----------------|----------------------------------|
| First     | Heavy    | RHIGVH1+7_EXT1 | CACCATGGACTGGACCTGGAGGMTCCTC     |
| First     | Heavy    | RHIGVH1+7_EXT2 | CACCATGGACCTGACCCGGAGGATCCTTTTC  |
| First     | Heavy    | RHIGVH2_EXT    | CACCATGGACACGCTTTGCTCCACRCTC     |
| First     | Heavy    | RHVH3_EXT1_N   | CATGGAGTTGGGGCTGAGCTGGGTYTTCC    |
| First     | Heavy    | RHVH3_EXT2_N   | CATGGAGTTGGGGCTGAGYTGGGTTTTCC    |
| First     | Heavy    | RHVH3_EXT3_N   | CATGGAGTTTGGGCTGAGCTGGR          |
| First     | Heavy    | RHVH3_EXT4_N   | CATGGAGTTTGGGCTGAGCTKGGTTTTYC    |
| First     | Heavy    | RHVH4_EXT1_N   | ACCATGAAGCACCTGTGGTTCTBCCTCCTCC  |
| First     | Heavy    | RHVH4_EXT2_N   | CACCATGAAGCACCTGKGGTTCTTY        |
| First     | Heavy    | RHIGVH5_EXT    | CACCATGGGGTCAACTGCCMTCCTC        |
| First     | Heavy    | RHIGVH6_EXT    | CCATGTCTGTCTCCTTCCTCATCGTCC      |
| First     | Heavy    | RhIgA_EXTV5    | GAAGAAGCCCTGGACCAGGCAGGC         |
| First     | Heavy    | RhIgG-EXTV5    | AAGGTGTGCACGCCGCTGGTCAG          |
| First     | Heavy    | RhIgM_EXTV5    | GTCGGGAAGGAAGTCCTGTGCGAGG        |
| First     | Heavy    | RhIgD_EXTV5    | TCCCCAGGTGCCAGGTGACAGTCAC        |
| First     | Heavy    | RhIgE_EXTV5    | ACGGTCAGCAAGCTGATGGTGGCA         |
|           |          |                |                                  |
| First     | Kappa    | RHIGVK1_EXT1_N | CACCATGGACATGAGGGYCCC            |
| First     | Kappa    | RHIGVK1_EXT2_N | CACCATGGACATGAGGGTCCCCAGTC       |
| First     | Kappa    | RHIGVK1_EXT3_N | CACCATGGACATGAGGGTCCCCGGTTATC    |
| First     | Kappa    | RHIGVK1_EXT4_N | CACCATGGACATGAGGGTCYCCGGTCAG     |
| First     | Kappa    | RHIGVK1_EXT5_N | CACCATGGACATGAGGGTCCCCGGTCAGCTYC |
| First     | Kappa    | RHIGVK2_EXT1_N | CACCATGAGGCTCCCWGCTCAG           |
| First     | Kappa    | RHIGVK2_EXT2_N | CACCATGAGGCTCCCTGCTCAGCTYCTGGGGC |
| First     | Kappa    | RHIGVK3_EXT1_N | CACCATGGAAGCCCCAGCTCRGCTTCTC     |
| First     | Kappa    | RHIGVK3_EXT2_N | CACCATGGAAGCCCCAGCACAGCTTCTC     |
| First     | Kappa    | RHIGVK4_EXT    | CACCATGGTGTCACAGACCCAAGWCTTC     |
| First     | Kappa    | RHIGVK5_EXT    | CACCATGGGATCCCAGGTTACCTCCTCAG    |
| First     | Kappa    | RHIGVK6_EXT1   | CACCATGGTGTCATGCAACTCCTG         |
| First     | Kappa    | RHIGVK6_EXT2   | CACCATGTTGTCTCCATCACAACCTCATTG   |
| First     | Kappa    | RHIGVK7_EXT    | CACCATGGGGTCCTGGGCTCCTTTCCTG     |
| First     | Kappa    | RhCK_EXTV7     | ACCTGATCCTCAGATGGCGGGAAGATG      |
|           |          |                |                                  |
| First     | Lambda   | RHIGVL1_EXT1   | CACCATGGCCTGGTCTCCTCTCSTCCTCAC   |
| First     | Lambda   | RHIGVL1_EXT2   | CACCATGGCCTGGTCTCCTCTCCTTCTC     |
| First     | Lambda   | RHIGVL2_EXT    | CACCATGGCCTGGGCTCTGSTCCTC        |
| First     | Lambda   | RHIGVL3_EXT1   | CACCATGGCCGGGACCCYTCTCCTCCTC     |
| First     | Lambda   | RHIGVL3_EXT2_N | CACCATGGCCTGGACCCCTGTTCTGCTC     |

|        |        |                  |                                                              |
|--------|--------|------------------|--------------------------------------------------------------|
| First  | Lambda | RHIGVL3_EXT3     | CACCATGGCCTGGACCCCTCCCCTRTC                                  |
| First  | Lambda | RHIGVL4_EXT      | CACCATGGCCTGGACCCACTCCTCCTC                                  |
| First  | Lambda | RHIGVL5_EXT      | CACCATGGCCTGGACTCYTCTC                                       |
| First  | Lambda | RHIGVL6_EXT      | CACCATGGCCTGGGCTCCACTCCTCCTC                                 |
| First  | Lambda | RHIGVL7_EXT      | CACCATGGCCTGGACTCTGCTCCTCCTCC                                |
| First  | Lambda | RHIGVL8_EXT      | CACCATGGCCTGGATGATGCTTCTCCTCG                                |
| First  | Lambda | RHIGVL11_EXT     | CACCATGGCCCTGACTCCTCTCCTCCTC                                 |
| First  | Lambda | RhCL_EXTV7       | TGCCATCTGCCTTCCAGGCCACTT                                     |
|        |        |                  |                                                              |
| Second | Heavy  | RHIGVH1+7_INT1   | CCAAGCTGGCTAGCACCATGGACTGGACCTGGAGGMTCCCTC                   |
| Second | Heavy  | RHVH1+7_INT2_N   | CCAAGCTGGCTAGCACCATGGACCTSACCCGGAGSATCCTTTTC                 |
| Second | Heavy  | RHIGVH2_INT      | CCAAGCTGGCTAGCACCATGGACACGCTTTGCTCCAC                        |
| Second | Heavy  | RHVH3_INT1_N     | CCAAGCTGGCTAGCACCATGGAGTTGGGGCTGAGYTG                        |
| Second | Heavy  | RHVH3_INT2_N     | CCAAGCTGGCTAGCACCATGGAGTTTGGGGCTGAGCTKG                      |
| Second | Heavy  | RHVH4_INT_N      | CCAAGCTGGCTAGCACCATGAAGCACCTGKGGTTC                          |
| Second | Heavy  | RHIGVH5_INT      | CCAAGCTGGCTAGCACCATGGGGTCAACTGCCMTCCCTC                      |
| Second | Heavy  | RHIGVH6_INT      | CCAAGCTGGCTAGCACCATGTCTGTCTCCTTCCATCATCGTC                   |
| Second | Heavy  | RhIgA_ACD_IntV20 | CAGGGCCGCTGTGCTCTCGGAGGTGCTCCTGCCCTCGAGGCTCA<br>GCGGGAAGAC   |
| Second | Heavy  | RhIgA_BC_IntV20  | CAGGGCCGCTGTGCTCTCGGAGGTGCTCCTGCTGCAGAGGYTCA<br>GCGGGAAGAC   |
| Second | Heavy  | RhIgG_IntV20     | CAGGGCCGCTGTGCTCTCGGAGGTGCTCCTGGAG                           |
| Second | Heavy  | RhIgM_IntV20     | CAGGGCCGCTGTGCTCTCGGAGGTGCTCCTCTCACAGGAGACGA<br>GGGGGAAAAG   |
| Second | Heavy  | RhIgD_IntV20     | CAGGGCCGCTGTGCTCTCGGAGGTGCTCCTGTTATCCTTTGGGA<br>GTTGGCACGCTG |
| Second | Heavy  | RhIgE_IntV20     | CAGGGCCGCTGTGCTCTCGGAGGTGCTCCTGCAGCAGGGGATCA<br>AGGGGAAGAC   |
|        |        |                  |                                                              |
| Second | Kappa  | RHIGVK1_INT1_N   | CCAAGCTGGCTAGCACCATGGACATGAGGGYCCC                           |
| Second | Kappa  | RHIGVK1_INT2_N   | CCAAGCTGGCTAGCACCATGGACATGAGGGTCYCCG                         |
| Second | Kappa  | RHIGVK2_INT1_N   | CCAAGCTGGCTAGCACCATGAGGCTCCCWGCTC                            |
| Second | Kappa  | RHIGVK3_INT1_N   | CCAAGCTGGCTAGCACCATGGAAGCCCCAGCWC                            |
| Second | Kappa  | RHIGVK4_INT      | CCAAGCTGGCTAGCACCATGGTGTACAGACCCAAG                          |
| Second | Kappa  | RHIGVK5_INT      | CCAAGCTGGCTAGCACCATGGGATCCCAGGTTACCTCC                       |
| Second | Kappa  | RHIGVK6_INT1     | CCAAGCTGGCTAGCACCATGGTGTCCCCATTGCAACTC                       |
| Second | Kappa  | RHIGVK6_INT2     | CCAAGCTGGCTAGCACCATGTTGTCTCCATCACAACTC                       |
| Second | Kappa  | RHIGVK7_INT      | CCAAGCTGGCTAGCACCATGGGGTCCTGGGCTCCTTTCC                      |
| Second | Kappa  | RhCK_INTv6       | TGGCGGGAAGATGAAGACAGATGGTG                                   |
|        |        |                  |                                                              |
| Second | Lambda | RHIGVL1_INT      | CCAAGCTGGCTAGCACCATGGCCTGGTCTCCTCTC                          |
| Second | Lambda | RHIGVL2_INT      | CCAAGCTGGCTAGCACCATGGCCTGGGCTCTGSTCC                         |
| Second | Lambda | RHIGVL3_INT1_N   | CCAAGCTGGCTAGCACCATGGCCGGGACCCYTC                            |

|        |        |                |                                        |
|--------|--------|----------------|----------------------------------------|
| Second | Lambda | RHIGVL3_INT2_N | CCAAGCTGGCTAGCACCATGGCCTGGACCCCTS      |
| Second | Lambda | RHIGVL4_INT_N  | CCAAGCTGGCTAGCACCATGGCCTGGACCCCACTCC   |
| Second | Lambda | RHIGVL5_INT    | CCAAGCTGGCTAGCACCATGGCCTGGACTCYTCTC    |
| Second | Lambda | RHIGVL6_INT_N  | CCAAGCTGGCTAGCACCATGGCCTGGGCTCCACTC    |
| Second | Lambda | RHIGVL7_INT    | CCAAGCTGGCTAGCACCATGGCCTGGACTCTGCTCCTC |
| Second | Lambda | RHIGVL8_INT    | CCAAGCTGGCTAGCACCATGGCCTGGATGATGCTTCTC |
| Second | Lambda | RHIGVL11_INT   | CCAAGCTGGCTAGCACCATGGCCCTGACTCCTCTCCTC |
| Second | Lambda | RhCL_INTv6     | GTCACTGATCAGACACACTAGTGTGG             |



## **Supplementary references**

1. deCamp A, et al. Global panel of HIV-1 Env reference strains for standardized assessments of vaccine-elicited neutralizing antibodies. *Journal of virology* 88, 2489-2507 (2014).
